# Supplementary material
Source: PubMed Central journal article supplement (PMC3136650)

Supplemental Figure 1

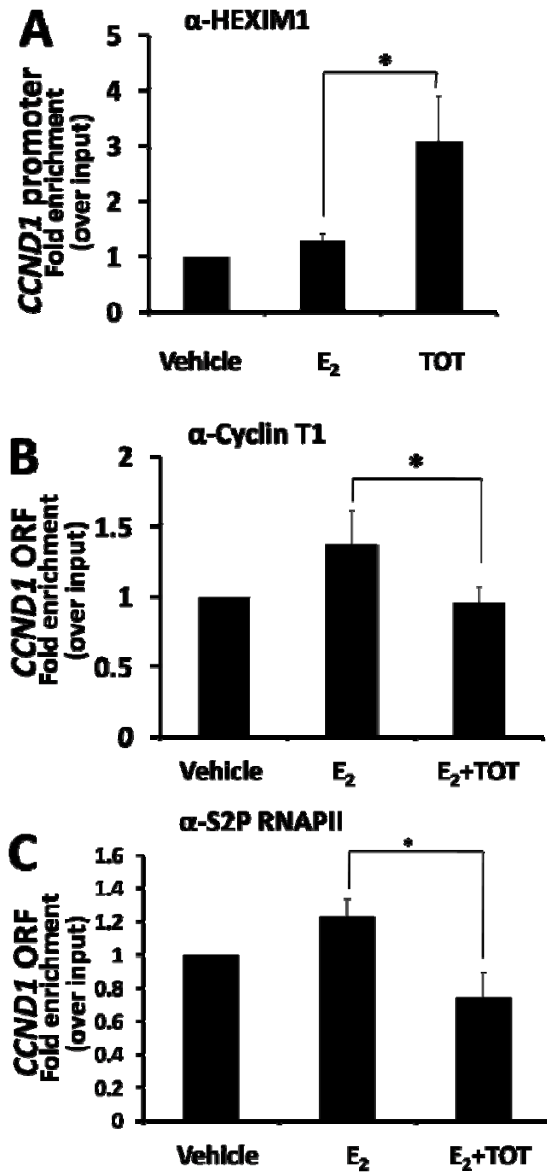

Supplemental Figure 2

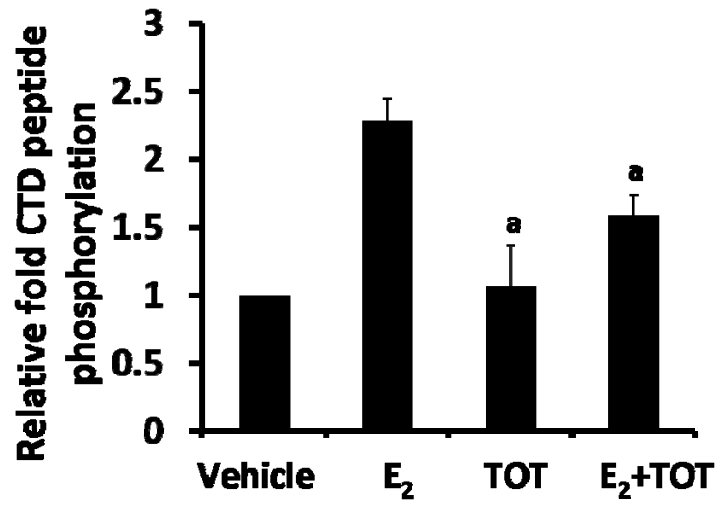

Supplemental Figure 3

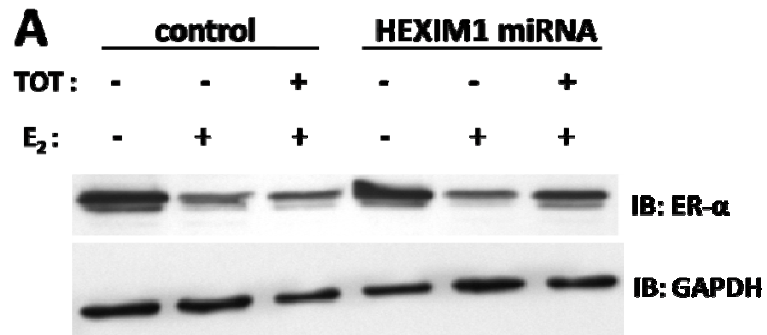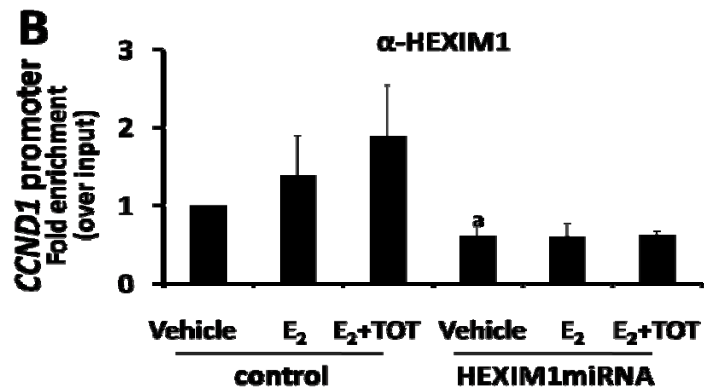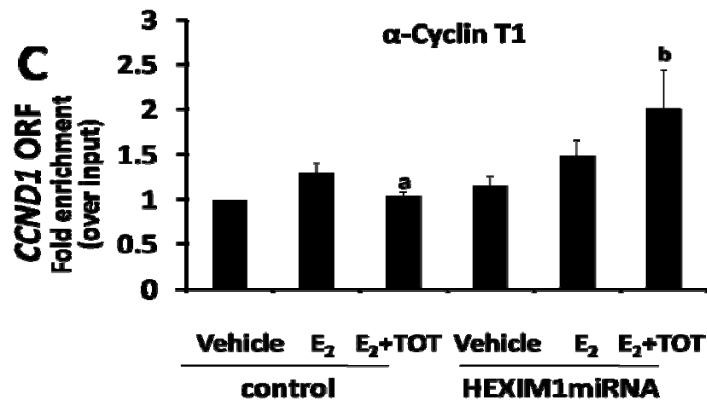

# Supplemental Figure 4

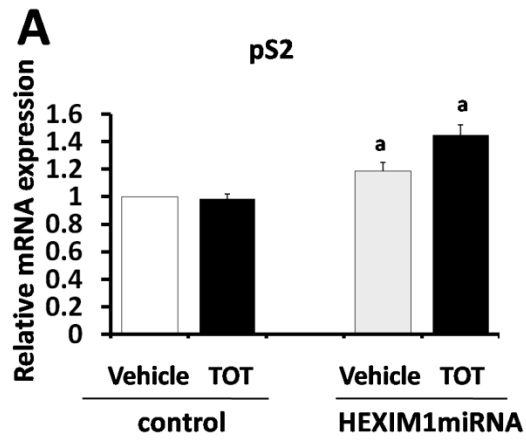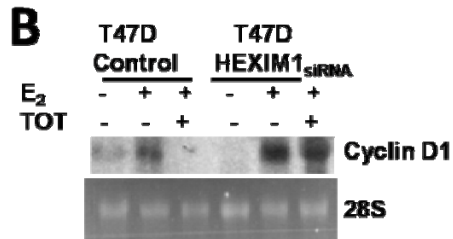

Supplement: NIHMS269868-supplement-1.pdf [file NIHMS269868-supplement-1.pdf]
